# Supplementary material for: White spot syndrome virus VP28 specific double-stranded RNA provides protection through a highly focused siRNA population
Source: PubMed Central journal article supplement (PMC5430881; doi:10.1038/s41598-017-01181-w), 2017-04-21
Supplement: 41598_2017_1181_MOESM1_ESM.pdf [file 41598_2017_1181_MOESM1_ESM.pdf]

# White spot syndrome virus VP28 specific double-stranded RNA provides protection through a highly focused siRNA population

Pål Nilsen, Marius Karlsen, Kallaya Sritunyalucksana, Siripong Thitamadee

## Supplementary Data S1

### dsRNA treatment sequences

#### GFP

Length; 240bp

#### Sequence;

```
ATGGTGAGCAAGGGCGAGGAGCTGTTACCGGGGTGGTGCCCATCCTGGTTCGAGCTGGACGGC  
GACGTAAACGGCCACAAGTTCAGCGTGTCCGGCGAGGGCGATGCCACCTACGGCAAG  
CTGACCCTGAAGTTCATCTGCACCACCGGCAAGCTGCCCGTGCCCTGGCCCACCCTCGTGACCA  
CCCTGACCTACGGCGTGCAGTGCTTCAGCCGCTACCCCGACCACATGAAG
```

#### VP28

Length; 600bp

#### Sequence;

```
ATGGATCTTTCTTTCACTCTTTTCGGTTCGTGTCCGCCATCCTCGCCATCACTGCTGTGATTGCTGTA  
TTTATTGTGATTTTTAGGTATCACAACACTGTGACCAAGACCATCGAAACCCACACAGACAATATC  
GAGACAAACATGGATGAAAACCTCCGCATTCTGTGACTGCTGAGGTTGGATCAGGCTACTTCAA  
GATGACTGATGTGTCTTTGACAGCGACACCTTGGGCAAAATCAAGATCCGCAATGGAAAGTCTG  
ATGCACAGATGAAGGAAGAAGATGCGGATCTTGTTCATCACTCCCGTGGAGGGCCGAGCACTCGA  
AGTGACTGTGGGGCAGAATCTCACCTTTGAGGGAACATTCAAGGTGTGGAACAACACATCAAGAA  
AGATCAACATCGCTGGTATGCAGATGGTGCCAAAGATTAACCCATCAAAGGCCTTTGTCCGGTAGC  
TCCAACACCTCCTCCTTCACCCCGTCTCTATTGATGAGGATGAAGTTGGCACCTTTGTGTGTGG  
TACCACCTTTGGCGCACCAATTGCAGCTACCGCCGGTGGAATCTTTTCGACATGTACGTGCACG  
TCACCTACTCTGGC
```
